# Supplementary material for: Duration of Different Stages in the Diagnosis and Treatment of Diabetic Retinopathy and Analysis of Influencing Factors
Source: Research Square preprint supplement (doi:10.21203/rs.3.rs-8723201/v1), 2026-02-04
Supplement: Supplementary file 1 [file 0efda0fa4894cf13d53f8b43.docx]

Supplementary material

Contents: Appendix S1. Diabetic Retinopathy Self-Management Scale;

Appendix S2. Diabetic Retinopathy Prevention and Treatment Knowledge Questionnaire;

Appendix S3. Visual Function Questionnaire;

Appendix S4. Quality of Life Questionnaire;

Appendix S5. Zarit Burden Interview (ZBI).

**Supplementary Appendix S1. Diabetic Retinopathy Self-Management Scale**

Instruction: The following are 31 items. For each item, please tick (✓) the option that best reflects your actual situation.

Response options (score): 1 = Not at all able to do; 2 = Occasionally able to do; 3 = Basically able to do; 4 = Completely able to do.

| **No.** | **Item** | **1 Not at all** | **2 Occasionally** | **3 Basically** | **4 Completely** |
| --- | --- | --- | --- | --- | --- |
| 1 | Have healthy lifestyle habits |  |  |  |  |
| 2 | Quit smoking and alcohol consumption |  |  |  |  |
| 3 | Maintain a healthy body weight |  |  |  |  |
| 4 | Engage in appropriate exercise |  |  |  |  |
| 5 | Measure body weight regularly (monthly) |  |  |  |  |
| 6 | Attend follow-up visits regularly |  |  |  |  |
| 7 | Seek medical care immediately when vision changes occur |  |  |  |  |
| 8 | Undergo regular eye examinations |  |  |  |  |
| 9 | Have regular fundus examinations |  |  |  |  |
| 10 | Communicate with family members in a timely manner |  |  |  |  |
| 11 | Receive support from family |  |  |  |  |
| 12 | Maintain an optimistic mood |  |  |  |  |
| 13 | Avoid negative emotions |  |  |  |  |
| 14 | Try to control my emotions when encountering problems |  |  |  |  |
| 15 | Reassure myself and keep calm |  |  |  |  |
| 16 | Develop a weekly exercise plan and progress gradually |  |  |  |  |
| 17 | Maintain aerobic exercise (e.g., walking, hiking, jogging, Baduanjin, Tai Chi, Qigong, etc.) |  |  |  |  |
| 18 | Avoid strenuous exercise |  |  |  |  |
| 19 | If chest tightness, blurred vision, etc. occur during exercise, stop immediately and manage promptly |  |  |  |  |
| 20 | Control diet appropriately |  |  |  |  |
| 21 | Develop a scientific dietary plan |  |  |  |  |
| 22 | Determine total caloric intake and allocate calories across meals according to the condition |  |  |  |  |
| 23 | Strictly limit fat and sweets intake; restrict sodium salt intake to <10 g/day |  |  |  |  |
| 24 | Eat more leafy vegetables, fruits, whole grains/mixed grains, and high dietary-fiber foods |  |  |  |  |
| 25 | Avoid eye fatigue/strain |  |  |  |  |
| 26 | Avoid ocular trauma |  |  |  |  |
| 27 | Maintain ocular hygiene |  |  |  |  |
| 28 | Monitor blood glucose regularly |  |  |  |  |
| 29 | Consult a doctor when blood glucose increases or decreases |  |  |  |  |
| 30 | Use the glucometer correctly |  |  |  |  |
| 31 | Keep a blood glucose diary consistently |  |  |  |  |

The Diabetic Retinopathy Self-Management Scale was developed by Feng Huilan et al. in 2015 [21]. It contains 31 items across six domains: symptom management, emotional management, exercise, dietary regimen, ocular care, and blood glucose monitoring. Each item is scored from 1 to 4, with higher scores indicating better self-management. The overall Cronbach's alpha, test-retest reliability, and content validity index were 0.902, 0.897, and 0.901, respectively.

**Supplementary Appendix S2. Diabetic Retinopathy Prevention and Treatment Knowledge Questionnaire**

Instruction: The following are 10 items. Please tick (✓) the appropriate box. Thank you for your cooperation.

Response options: Yes (I know) / No (I do not know).

| **No.** | **Item** | **Yes** | **No** |
| --- | --- | --- | --- |
| 1 | Do you know that diabetic retinopathy (DR) is one of the microvascular complications of diabetes? |  |  |
| 2 | Do you know that DR often has no symptoms in the early stage? |  |  |
| 3 | Do you know that symptoms that can be perceived in DR include blurred vision, floaters, visual distortion, and decreased visual acuity? |  |  |
| 4 | Do you know that DR should be prevented and treated early, and that prevention is better than treatment? |  |  |
| 5 | Do you know that DR can be managed with diet, exercise, medication, laser therapy, surgery, etc.? |  |  |
| 6 | Do you know that vision loss caused by DR is difficult to fully return to normal after treatment? |  |  |
| 7 | Do you know that severe DR may lead to blindness? |  |  |
| 8 | Do you know that a fundus examination every 3-6 months helps detect DR at an early stage? |  |  |
| 9 | Do you know that timely treatment of DR can delay disease progression? |  |  |
| 10 | Do you know that poor control of blood glucose, blood pressure, and blood lipids can accelerate disease progression? |  |  |

This questionnaire was developed by Li Feng [22] and consists of 10 items. "Yes" is scored as 1 and "No" as 0; a higher total score indicates better knowledge of DR prevention and treatment. The Cronbach's alpha coefficient of the questionnaire is 0.912.

**Supplementary Appendix S3. Vision Activities Questionnaire (Table 1)**

Respondent information: Name ________ ID ________ (Pre-/Post-operative) ____ days

Date of survey: ____/____/____

Instruction: I will ask you some questions about your vision. For each question, please select one of the four response options that best reflects your actual situation.

Item 1 response options: 1 = Excellent; 2 = Good; 3 = Fair; 4 = Poor.

| **No.** | **Question** | **Excellent** | **Good** | **Fair** | **Poor** |
| --- | --- | --- | --- | --- | --- |
| 1 | In general, how would you rate your vision? (If you wear glasses, please answer based on your vision with glasses.) | 1 | 2 | 3 | 4 |

Items 2-11b response options: 1 = Not difficult at all; 2 = A little difficult; 3 = Quite difficult; 4 = Very difficult.

| **No.** | **Question** | **1** | **2** | **3** | **4** |
| --- | --- | --- | --- | --- | --- |
| 2 | To what extent does your vision limit your daily life? |  |  |  |  |
| 3 | How much difficulty do you have seeing a person across the street? |  |  |  |  |
| 4 | How much difficulty do you have seeing the face of a person standing next to you? |  |  |  |  |
| 5 | How much difficulty do you have seeing small objects (e.g., a grain in your hand or the lines on your palm)? |  |  |  |  |
| 6 | When walking forward alone, how much difficulty do you have noticing things along the roadside? |  |  |  |  |
| 7a | How much difficulty do you have adapting to a dim environment when moving from bright to dark? |  |  |  |  |
| 7b | How much difficulty do you have adapting to a bright environment when moving from dark to bright? |  |  |  |  |
| 8 | How much difficulty do you have finding an object when it is mixed with other objects (e.g., finding a specific food in a bowl)? |  |  |  |  |
| 9 | How much difficulty do you have distinguishing colors? |  |  |  |  |
| 10 | When trying to pick up an object (e.g., a glass), you may perceive it as farther or nearer than it actually is. How much difficulty do you have picking it up? |  |  |  |  |
| 11a | When both you and the person you want to recognize are in bright light, how much difficulty do you have recognizing the person? |  |  |  |  |
| 11b | When strong light (e.g., oncoming headlights) dazzles you, how much difficulty do you have seeing clearly? |  |  |  |  |

**Supplementary Appendix S4. Quality of Life Questionnaire (Table 2)**

Instruction: The following questions ask how your vision affects your daily life. For each question, please select the response option that best reflects your actual situation.

1. Self-care: Due to vision problems, when no one helps you, how much difficulty do you have doing the following?

| **Task** | **1 No difficulty** | **2 Some difficulty** | **3 Quite difficult** | **4 Extremely difficult** | **Assistance None (=1)** | **Assistance Yes (=2)** |
| --- | --- | --- | --- | --- | --- | --- |
| Bathing |  |  |  |  |  |  |
| Eating |  |  |  |  |  |  |
| Dressing |  |  |  |  |  |  |
| Using the toilet |  |  |  |  |  |  |

2. Activities: Due to vision problems, when no one helps you, how much difficulty do you have doing the following?

| **Task** | **1 No difficulty** | **2 Some difficulty** | **3 Quite difficult** | **4 Extremely difficult** | **Assistance None (=1)** | **Assistance Yes (=2)** |
| --- | --- | --- | --- | --- | --- | --- |
| Walking to a neighbor’s home |  |  |  |  |  |  |
| Going shopping |  |  |  |  |  |  |
| Doing housework |  |  |  |  |  |  |

3. Social: Due to vision problems, when no one helps you, how much difficulty do you have doing the following?

| **Activity** | **1 Not at all** | **2 A little** | **3 Quite a lot** | **4 A great deal** |
| --- | --- | --- | --- | --- |
| Attending weddings/ceremonies |  |  |  |  |
| Celebrating holidays/festivals |  |  |  |  |
| Visiting friends/relatives |  |  |  |  |

4. Psychological: Due to vision problems, when no one helps you, do you feel that you are:

| **Statement** | **1 Completely no** | **2 A little** | **3 Mostly yes** | **4 Definitely yes** |
| --- | --- | --- | --- | --- |
| A burden to others |  |  |  |  |
| Depressed/low mood |  |  |  |  |
| Lacking motivation/interest in doing things |  |  |  |  |

This scale was developed by the Aravind Eye Hospital (India) and translated into Chinese by Liu Jie et al [23]. It consists of two parts: a visual function subscale and a quality-of-life (QoL) subscale. The visual function subscale includes four domains assessing vision-related daily activity limitations (Items 2-5), peripheral vision (Item 6), sensory adaptation (Items 7a, 7b, 8, 9, 11a, 11b), and stereopsis/depth perception (Item 10), using a 4-point Likert scale (1-4). The QoL subscale includes four domains assessing self-care, activities, social interaction, and psychological well-being, also using a 4-point Likert scale (1-4). After score standardization, higher scores indicate better visual function and QoL. Cronbach's alpha was 0.92 for the visual function subscale and 0.93 for the QoL subscale.

**Supplementary Appendix S5. Zarit Burden Interview (ZBI)**

Response options (score): 0 = Never; 1 = Rarely; 2 = Sometimes; 3 = Quite frequently; 4 = Nearly always. Please tick (✓) one option for each item.

| **No.** | **Item** | **0 Never** | **1 Rarely** | **2 Sometimes** | **3 Quite frequently** | **4 Nearly always** |
| --- | --- | --- | --- | --- | --- | --- |
| 1 | Do you feel that the person you care for asks for more help than they need? |  |  |  |  |  |
| 2 | Do you feel that, because of caregiving, you do not have enough time for yourself? |  |  |  |  |  |
| 3 | Do you feel stressed between caring for your relative and trying to meet other responsibilities (e.g., family, work)? |  |  |  |  |  |
| 4 | Do you feel embarrassed or uncomfortable because of your relative’s behavior? |  |  |  |  |  |
| 5 | Do you feel annoyed when your relative is around? |  |  |  |  |  |
| 6 | Do you feel that your relative has negatively affected your relationships with other family members or friends? |  |  |  |  |  |
| 7 | Are you afraid of what the future holds for your relative? |  |  |  |  |  |
| 8 | Do you feel that your relative is dependent on you? |  |  |  |  |  |
| 9 | Do you feel strained when your relative is around? |  |  |  |  |  |
| 10 | Do you feel that your health has suffered because of your involvement with your relative? |  |  |  |  |  |
| 11 | Do you feel that, because of caregiving, you do not have enough time for your personal affairs? |  |  |  |  |  |
| 12 | Do you feel that, because of caregiving, your social life has suffered? |  |  |  |  |  |
| 13 | Do you feel uncomfortable about having friends over because of your relative? |  |  |  |  |  |
| 14 | Do you feel that your relative seems to expect you to take care of them, as if you were the only one they can depend on? |  |  |  |  |  |
| 15 | Do you feel that you do not have enough money to care for your relative in addition to your other expenses? |  |  |  |  |  |
| 16 | Do you feel that you could spend more time caring for your relative? |  |  |  |  |  |
| 17 | Do you feel that you have lost control of your life since you began caring for your relative? |  |  |  |  |  |
| 18 | Do you wish you could leave the care of your relative to someone else? |  |  |  |  |  |
| 19 | Do you feel uncertain about what to do for your relative? |  |  |  |  |  |
| 20 | Do you feel that you should be doing more for your relative? |  |  |  |  |  |
| 21 | Do you feel that you could do a better job in caring for your relative? |  |  |  |  |  |

Item 22 (overall burden): Overall, how would you rate your caregiving burden? Please tick (✓) one option.

| **Item** | **None** | **Mild** | **Moderate** | **Severe** | **Extremely severe** |
| --- | --- | --- | --- | --- | --- |
| 22. Overall burden |  |  |  |  |  |

The ZBI was developed by Zarit et al. in 1980 [24] to assess caregiver burden. It was translated into Chinese by Wang Lie in 2006 and has been widely used in China. The scale includes 22 items across two dimensions (role burden and personal burden), assessing caregiver burden in terms of financial status, health, social life, and mental status. Items are rated from 0 to 4, and the sum of all items yields the total score; higher scores indicate greater burden. Total scores <20 indicate no burden; 20-39 mild burden; 40-59 moderate burden; and ≥60 severe burden. The Chinese version of the ZBI has a Cronbach's alpha of 0.87 and demonstrates good reliability and validity; it is among the most widely used tools for assessing caregiver burden.

Note: Reference numbers in square brackets correspond to the reference list in the main manuscript.
